# Supplementary material for: The Effect of Short-Term Aspirin Administration during Programmed Frozen-Thawed Embryo Transfer on Pregnancy Outcomes and Complications
Source: MDPI journal article supplement (doi:10.3390/jcm12031064), 2023-01-30
Supplement: s1 [file s1]

Supplemental Table S1.Differences in general population characteristics of obesity in ASA group and control group

|                                  | BMI<28kg/m <sup>2</sup> |               |         | BMI≥28kg/m <sup>2</sup> |               |         |
|----------------------------------|-------------------------|---------------|---------|-------------------------|---------------|---------|
|                                  | Aspirin group           | Control group | P value | Aspirin group           | Control group | P value |
|                                  | (n=1340)                | (n=2309)      |         | (n=321)                 | (n=484)       |         |
| Age(years)                       | 30.77±4.64              | 29.87±4.07    | <0.001  | 30.63±4.67              | 30.29±4.45    | 0.301   |
| BMI(kg/m <sup>2</sup> )          | 23.25±2.72              | 23.18±2.66    | 0.465   | 30.44±2.07              | 30.43±2.11    | 0.950   |
| Duration of infertility(years)   | 3.66±2.63               | 3.75±2.45     | 0.323   | 4.43±2.88               | 4.58±2.72     | 0.459   |
| Endometrial thickness in FET(cm) | 0.87±0.12               | 0.92±0.13     | <0.001  | 0.93±0.15               | 0.96±0.15     | 0.006   |
| Blood glucose(mmol/L)            | 5.25±0.45               | 5.23±0.44     | 0.204   | 5.46±0.82               | 5.40±0.66     | 0.215   |
| Systolic pressure(mmHg)          | 113.57±12.28            | 113.56±12.07  | 0.986   | 121.10±12.65            | 121.37±12.42  | 0.764   |
| Diastolic pressure(mmHg)         | 68.21±9.48              | 68.11±9.17    | 0.754   | 73.78±10.30             | 73.98±10.11   | 0.790   |
| Baseline FSH                     | 6.34±3.14               | 6.09±1.80     | 0.002   | 5.68±1.77               | 5.69±1.50     | 0.925   |
| Baseline LH                      | 7.14±5.30               | 7.44±5.19     | 0.099   | 6.46±4.83               | 6.66±4.21     | 0.527   |
| Baseline E2                      | 42.37±38.54             | 42.14±40.80   | 0.872   | 39.33±25.79             | 39.62±33.78   | 0.895   |
| Baseline AMH                     | 6.08±4.46               | 6.70±4.53     | <0.001  | 6.11±4.23               | 6.24±4.32     | 0.670   |
| Stage of embryo transferred      |                         |               | 0.053   |                         |               | 0.156   |
| Day 5                            | 1006(75.07)             | 1810(78.39)   |         | 238(74.14)              | 376(77.69)    |         |
| Day 6                            | 318(23.73)              | 469(20.31)    |         | 78(24.30)               | 106(21.90)    |         |
| Other                            | 16(1.19)                | 30(1.30)      |         | 5(1.56)                 | 2(0.41)       |         |
| Number of embryos transferred    |                         |               | 0.074   |                         |               | 0.989   |
| 1                                | 1277(95.30)             | 2228(96.49)   |         | 309(96.26)              | 466(96.28)    |         |
| 2                                | 63(4.70)                | 81(3.51)      |         | 12(3.74)                | 18(3.72)      |         |
| PCOS                             | 532(39.70)              | 1057(45.78)   | <0.001  | 185(57.63)              | 278(57.44)    | 0.956   |
| Endometriosis                    | 42(3.13)                | 94(4.07)      | 0.150   | 4(1.25)                 | 8(1.65)       | 0.641   |

|                                  | PCOS          |               |         | non-PCOS      |               |         |
|----------------------------------|---------------|---------------|---------|---------------|---------------|---------|
|                                  | Aspirin group | Control group | P value | Aspirin group | Control group | P value |
|                                  | (n=717)       | (n=1335)      |         | (n=944)       | (n=1458)      |         |
| Age(years)                       | 29.28±3.75    | 29.01±3.58    | 0.105   | 31.85±4.94    | 30.80±4.42    | <0.001  |
| BMI(kg/m <sup>2</sup> )          | 25.24±4.10    | 24.89±3.90    | 0.057   | 24.17±3.60    | 24.01±3.59    | 0.286   |
| Duration of infertility(years)   | 3.95±2.49     | 4.06±2.48     | 0.340   | 3.70±2.84     | 3.74±2.55     | 0.757   |
| Endometrial thickness in FET(cm) | 0.89±0.13     | 0.93±0.13     | <0.001  | 0.88±0.13     | 0.92±0.14     | <0.001  |
| Blood glucose(mmol/L)            | 5.28±0.49     | 5.25±0.44     | 0.241   | 5.30±0.59     | 5.27±0.53     | 0.131   |
| Systolic pressure(mmHg)          | 115.53±12.30  | 115.40±12.62  | 0.821   | 114.64±12.99  | 114.47±12.34  | 0.750   |
| Diastolic pressure(mmHg)         | 70.22±9.49    | 69.83±9.63    | 0.380   | 68.58±10.12   | 68.49±9.52    | 0.818   |
| Baseline FSH                     | 5.60±1.54     | 5.60±1.44     | 0.983   | 6.68±3.59     | 6.40±1.92     | 0.013   |
| Baseline LH                      | 8.99±6.37     | 9.19±5.71     | 0.473   | 5.51±3.45     | 5.58±3.56     | 0.608   |
| Baseline E2                      | 44.89±38.74   | 44.30±46.47   | 0.773   | 39.41±34.42   | 39.33±32.05   | 0.951   |
| Baseline AMH                     | 9.01±4.43     | 9.25±4.39     | 0.250   | 3.87±2.81     | 4.22±2.98     | 0.004   |
| Stage of embryo transferred      |               |               | 0.391   |               |               | 0.243   |
| Day 5                            | 593(82.71)    | 1134(84.94)   |         | 651(68.96)    | 1052(72.15)   |         |
| Day 6                            | 120(16.74)    | 193(14.46)    |         | 276(29.24)    | 382(26.20)    |         |
| Other                            | 4(0.55)       | 8(0.60)       |         | 17(1.80)      | 24(1.65)      |         |
| Number of embryos transferred    |               |               | 0.590   |               |               | 0.049   |
| 1                                | 681(94.98)    | 1275(95.51)   |         | 905(95.87)    | 1419(97.33)   |         |
| 2                                | 36(5.02)      | 60(4.49)      |         | 39(4.13)      | 39(2.67)      |         |
| Endometriosis                    | 12(1.67)      | 35(2.62)      | 0.171   | 34(3.60)      | 67(4.60)      | 0.236   |

PCOS, polycystic ovary syndrome; BMI, body mass index; FSH, follicle-stimulating hormone; LH, luteinizing hormone; AMH, anti-Müllerian hormone;
